# Supplementary material
Source: PubMed Central journal article supplement (PMC2844407)

Supplementary Table1:

|                           |                                                                      |
|---------------------------|----------------------------------------------------------------------|
| mPtc1-Δ7IC-F              | 5' -GTCCTCTTATCCTTCTTTTAAACCGTGCCTGAG-3'                             |
| mPtc1-Δ7IC-R              | 5' -CTCAGGACACGGTTAAAAGAAGGATAAGAGGAC-3'                             |
| mPtc1-Eco-7IC-F           | 5' -GAGGCCGAATTCGACCGTGTCTCGAGGTG-3'                                 |
| mPtc1-Pst-7IC-R           | 5' -TAGCTTGGCTGCAGGTCAGTTGGAGCTGCT-3'                                |
| mPtc1-1393StopQC-F        | 5-AGCTACCCTGAGACTGATTAAGGGGTATTTGAG-3                                |
| mPtc1-1393StopQC-R        | 5-CTCAAATACCCCTTAATCAGTCTCAGGGTAGCT-3                                |
| Ptc-myr7IC-F              | 5' -GCACCATGGGGAGTAGCAAGAGCAAGCCTAAGGACCCCAGCCAGCGCGACCGTGTCTG-3'    |
| Ptc-7IC-HA-R              | 5' -AAGGAAATGCGGCCGCTTAAGCGTAATCTGGAACATCGTATGGGTAGTTGGAGCTGCTCCC-3' |
| DralΔLim2-F               | 5' -CCAACGAGTACTCATCCAAGTATGAGAAAACAACATGCCATG-3'                    |
| DralΔLim2-R               | 5' -CATGGCATGTTGTTTCTCATACTTGGATGAGTACTCGTTGG-3'                     |
| Chick-DRAL-F              | 5' -CACCATGACTGAGCGTTTCGACTGCCAC-3'                                  |
| Chick-DRAL-R              | 5' -TTAAGCGTAATCTGGAACATCGTATGGGTAGATATCCTTTCCACATTCAGG-3'           |
| pCAGGS-Chick-DRAL-XhoI-F  | 5' -AATTCTCGAGATGACTGAGCGTTTCGACTGCCAC-3'                            |
| pCAGGS-Chick-DRAL-BglII-R | 5' -AATTAGATCTTTAGATATCCTTTCCACATTCAGG-3'                            |
| shDRAL1-F                 | 5' -GGCACAATGATTGCTTTAATTCAGAGATTAAGCAATCATTGTGCCTTTTTT-3'           |
| shDRAL1-R                 | 5' -AATTAAAAAAGGCACAATGATTGCTTTAATCTCTTGAATTAAGCAATCATTGTGCCGGCC-3'  |
| scramble DRAL1-F          | 5' -GATGCCTGCATATGTAAATTTCAAGAGAATTTACATATGCAGGCATCTTTTTT-3'         |
| scramble DRAL1-R          | 5' -AATTAAAAAAGATGCCTGCATATGTAAATTTCTCTTGAATTTACATATGCAGGCATCGGCC-3' |
| TUCANΔNterm-F             | 5' -CACCATGGTAGCTGCATCAGCCCTCCT-3'                                   |
| TUCANΔNterm-Myc-R         | 5' -TTACAGATCCTCTCAGAGATGAGTTTCTGTTCCAAATCTGCTGTCTAAGATAG-3'         |

**a**

|                                                              |
|--------------------------------------------------------------|
| down regulated in rhabdomyosarcoma LIM protein (DRAL)        |
| sin3-associated polypeptide, 18kDa (SAP18)                   |
| cytoskeleton associated protein 1 (CKAP1)                    |
| RNA-binding region containing 2 (RNPC2)                      |
| contactin 1 (CNTN1)                                          |
| metalloproteinase, disintegrin, cysteine-rich protein (MDC2) |
| proline rich protein BCA3 (BCA3)                             |

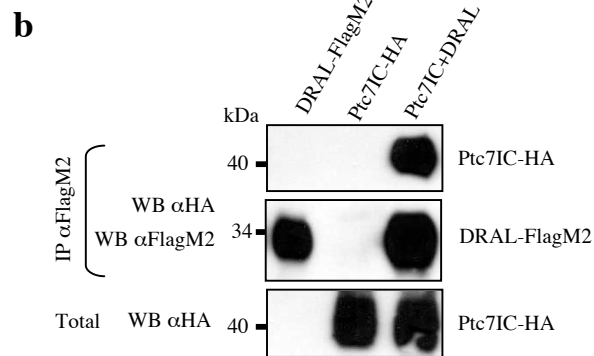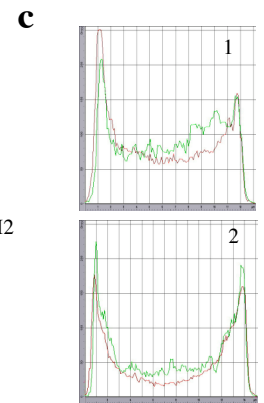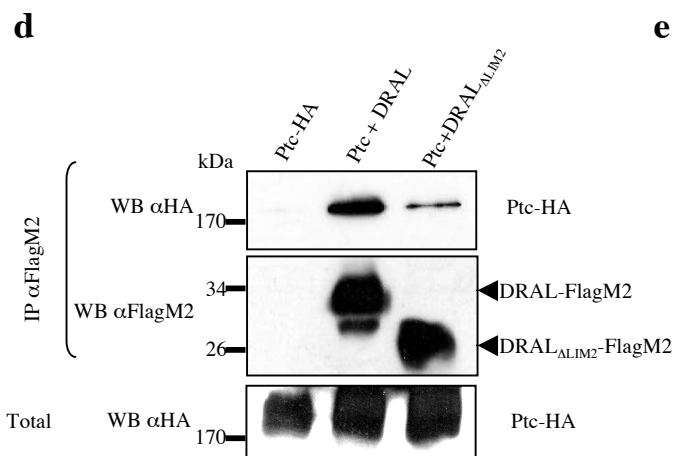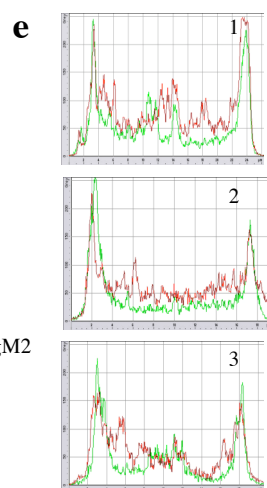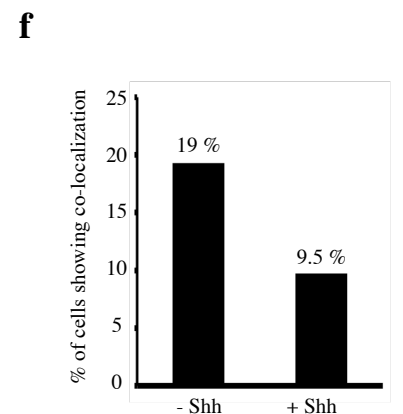

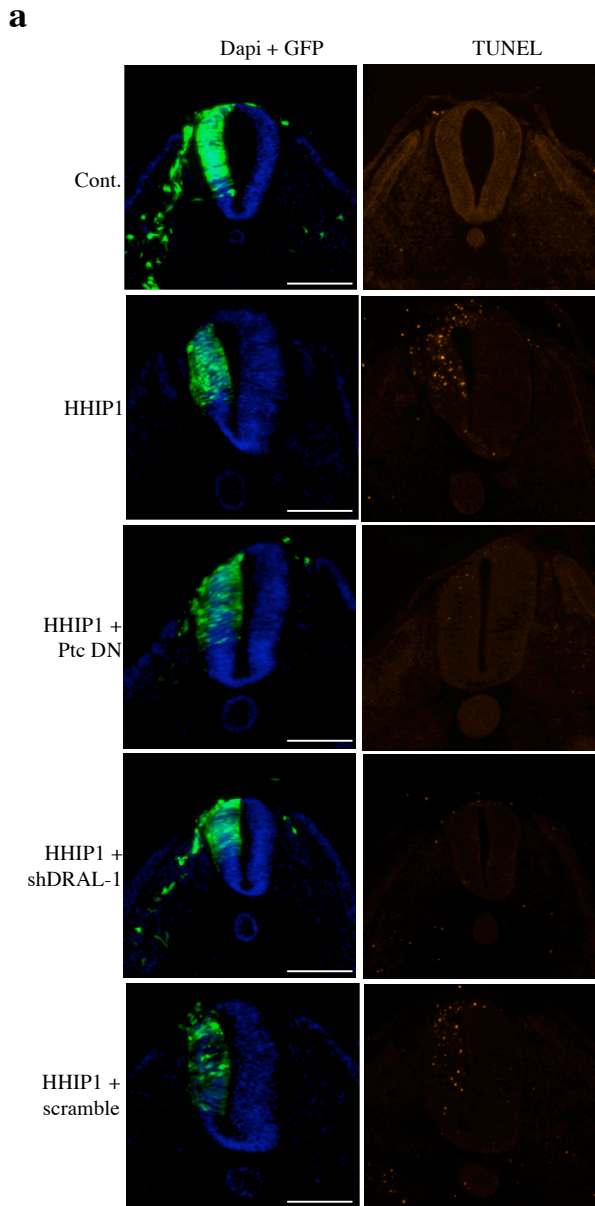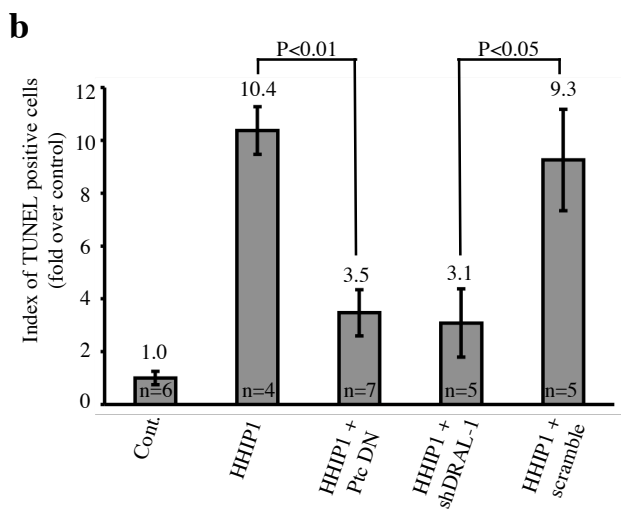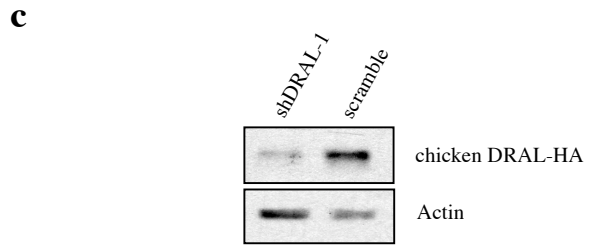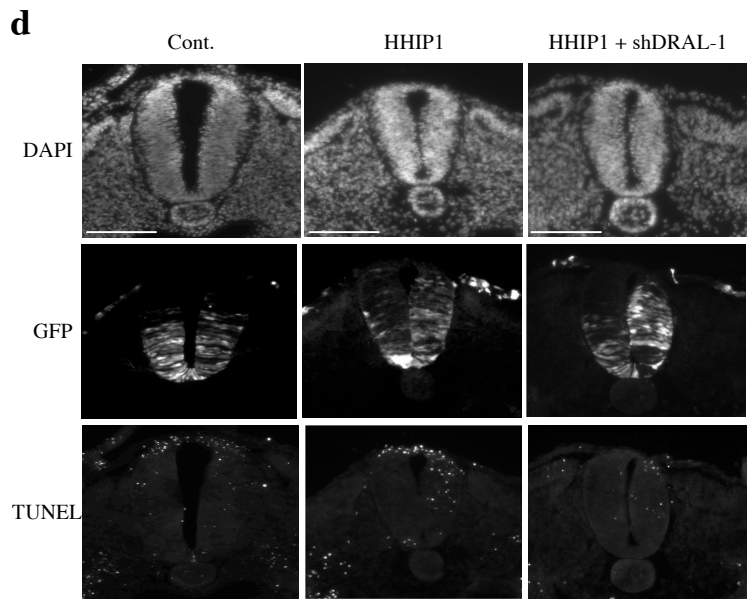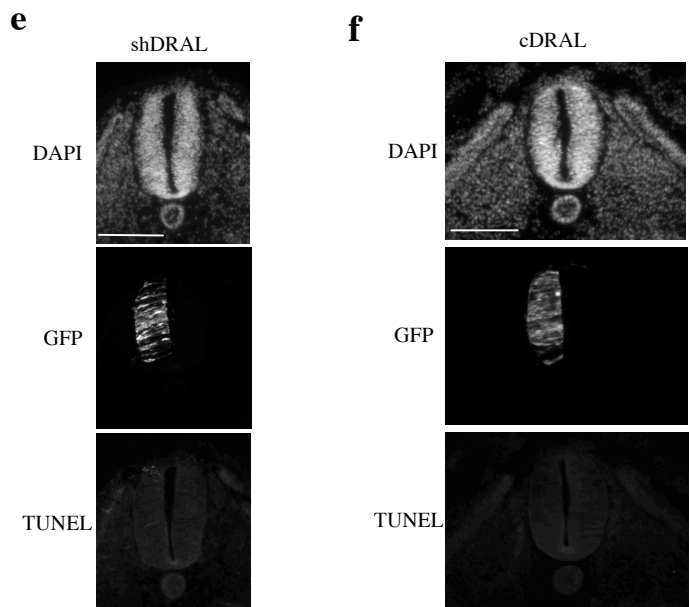

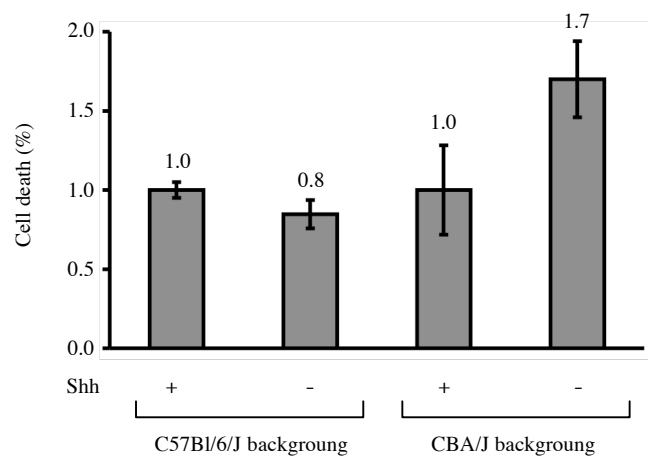

**a**

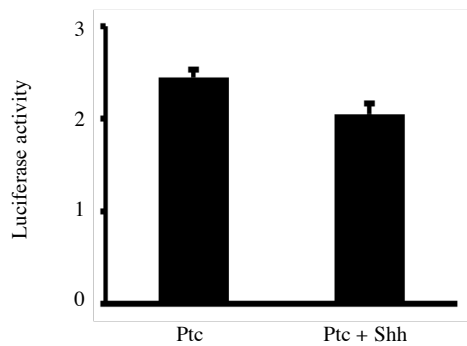

**b**

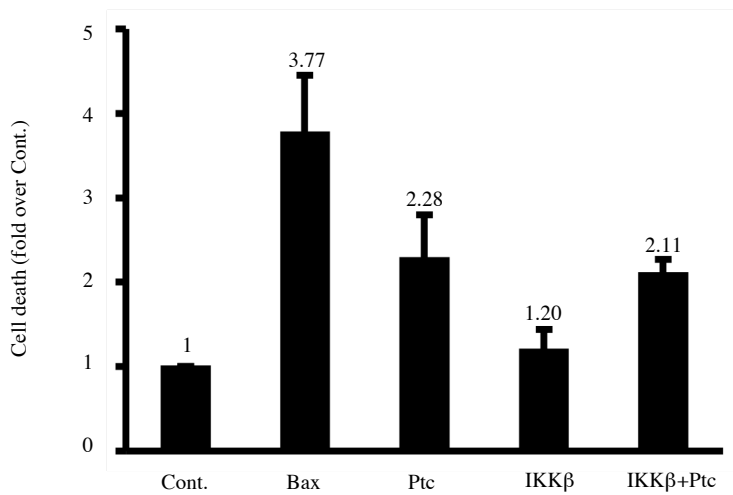

**c**

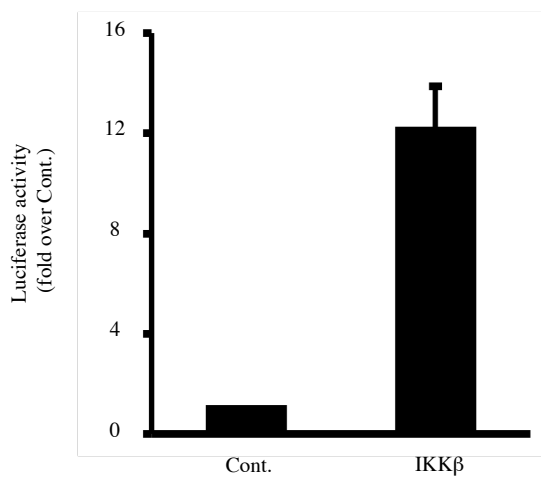

**a**

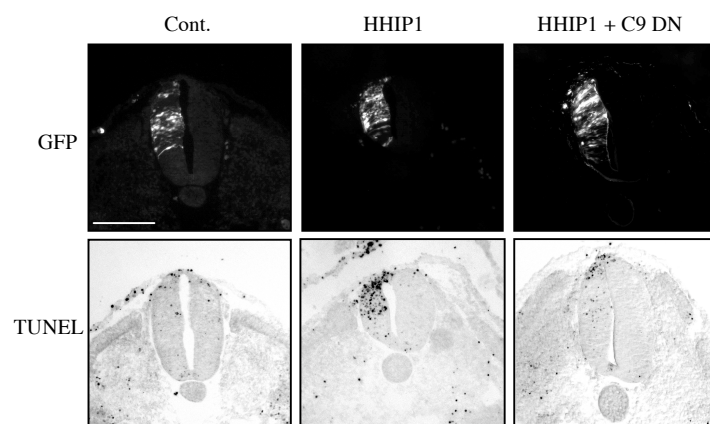

**b**

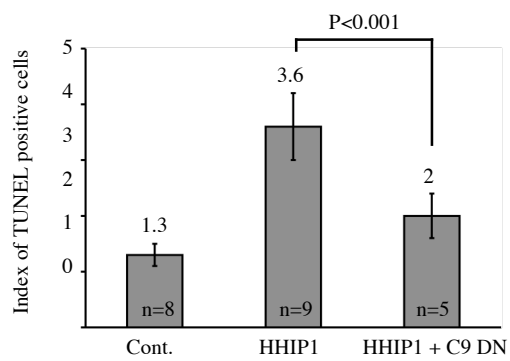

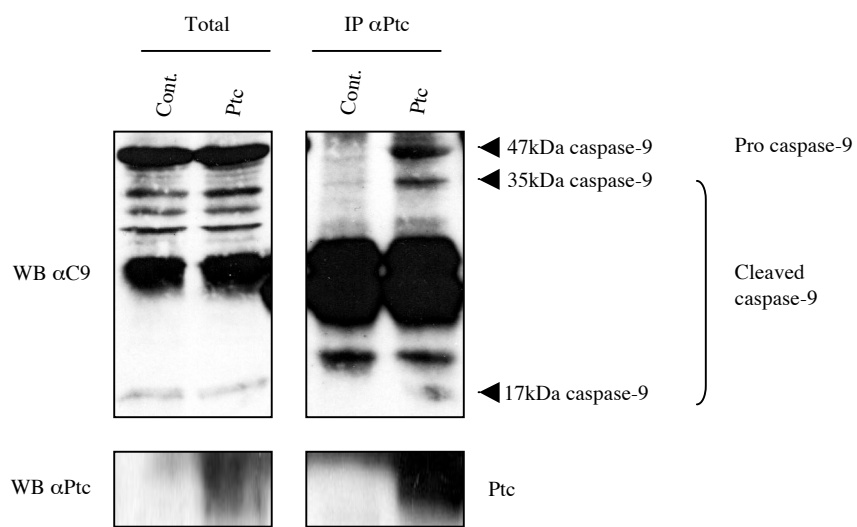

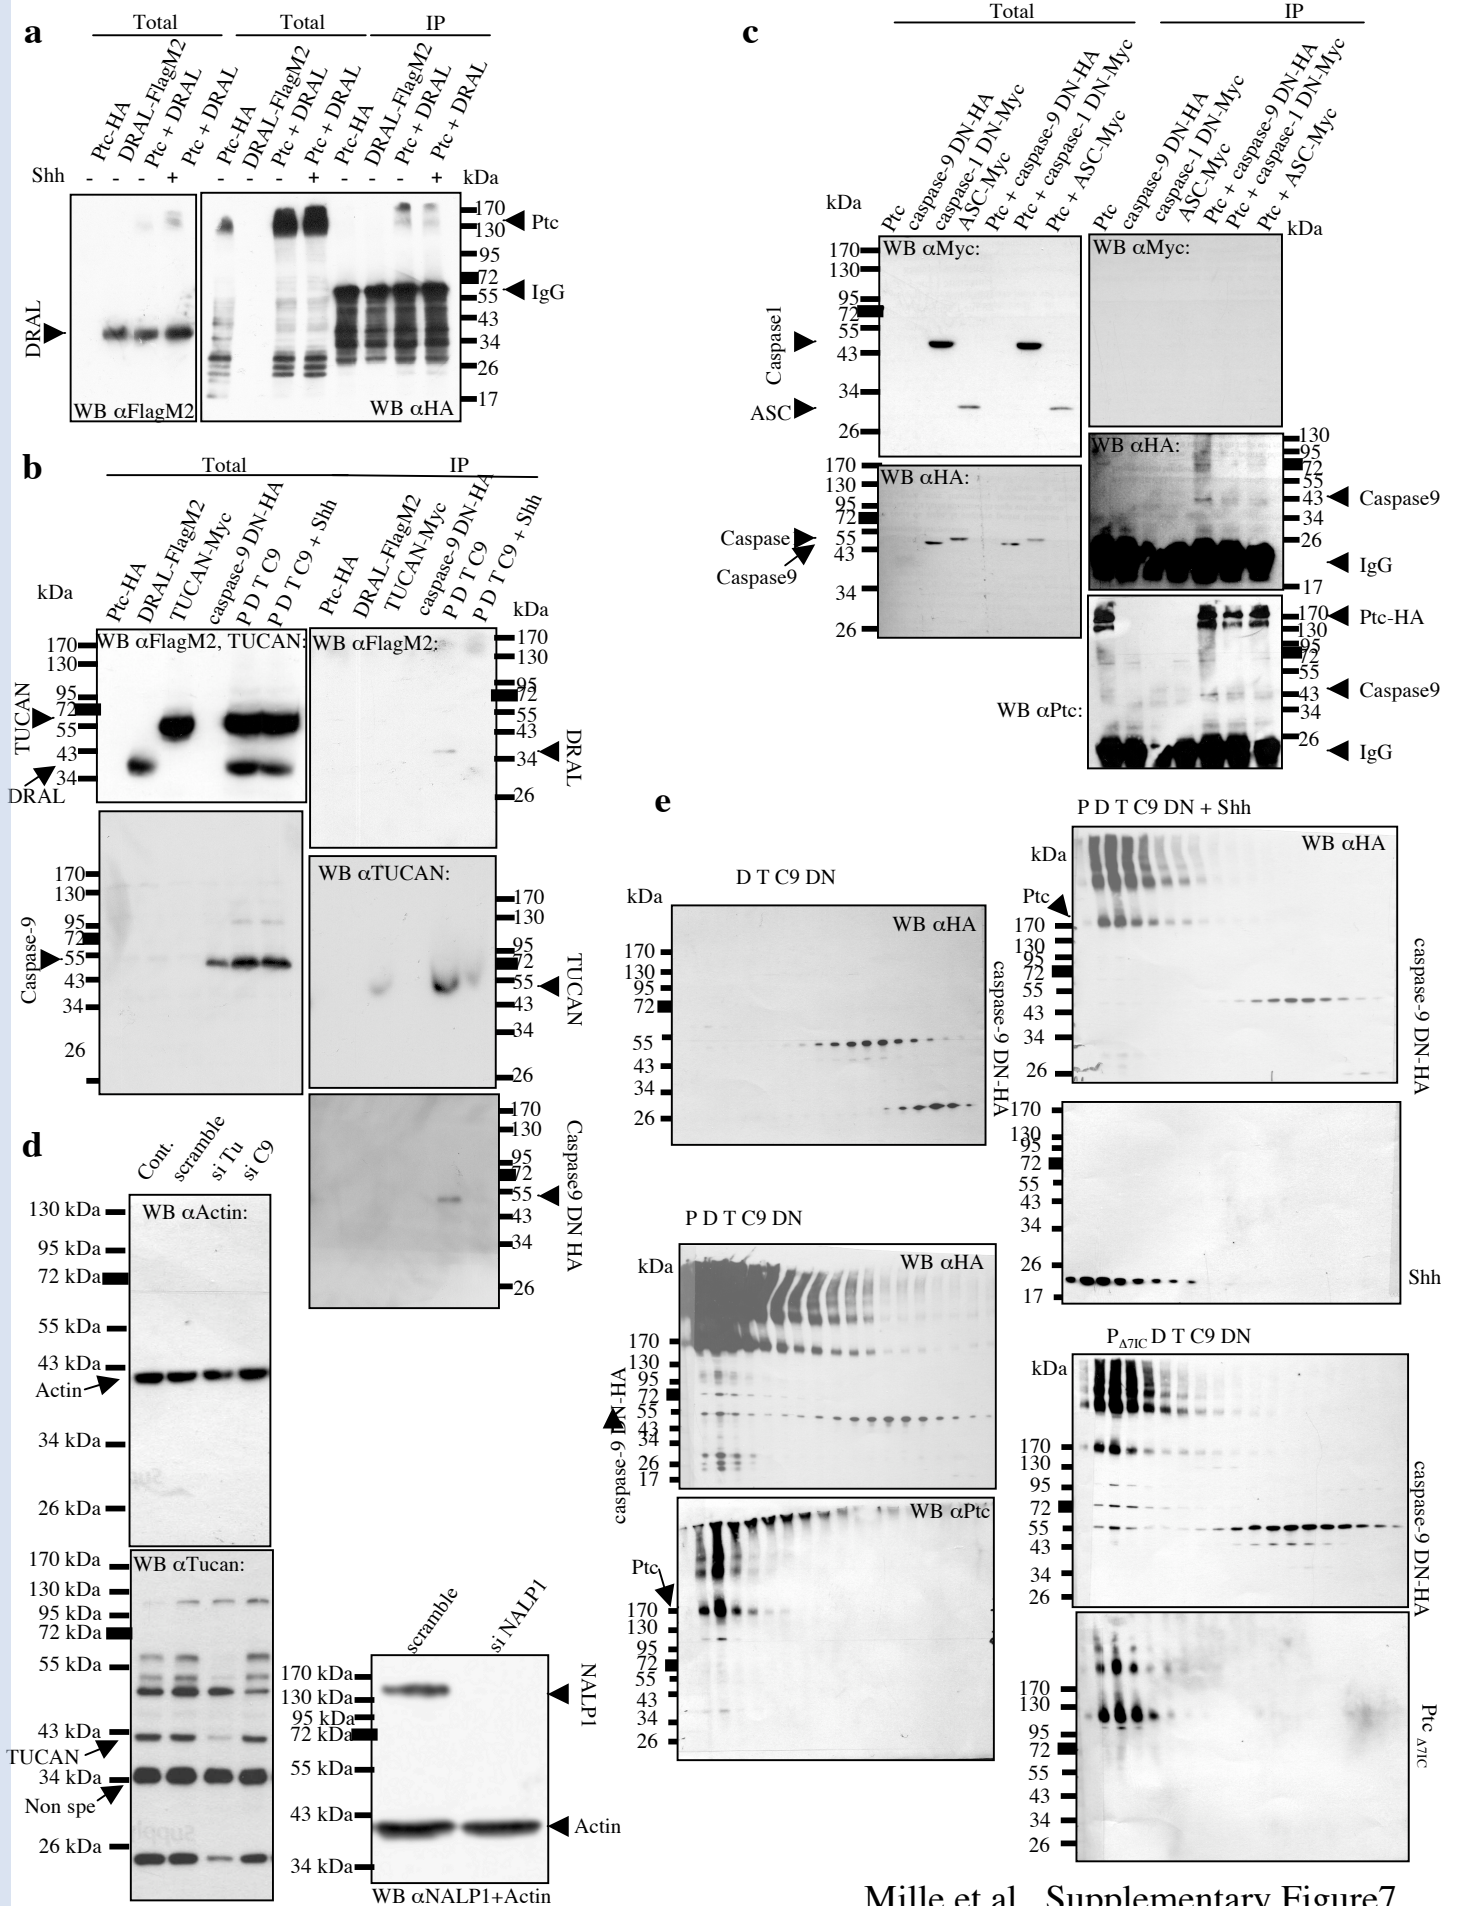

Supplement: halms405390-supplement_1.pdf [file halms405390-supplement_1.pdf]
